# Supplementary material for: Incidence and Predictors of Mortality Among Preterm Neonates Admitted to Neonatal Intensive Care Units in Comprehensive Specialized Hospitals in Northeast Ethiopia: A Multi-Center Prospective Follow-Up Study
Source: Research Square preprint supplement (doi:10.21203/rs.3.rs-4712637/v1), 2024-08-10
Supplement: Supplementary file 1 [file f56a2e4ddf6986ddb3a8c6db.pdf]

**Table: Obstetric, Labor, and Delivery-Related Characteristics of Mothers Whose Preterm Newborns Were Admitted to the NICU of Comprehensive Specialized Hospitals in Northeastern Ethiopia, 2024 (n=350)**

| Variables                                  | Death      | Censored    | log-rank test                           |
|--------------------------------------------|------------|-------------|-----------------------------------------|
| <b>Parity</b>                              |            |             | X <sup>2</sup> = 0.79 (p-value= 0.3728) |
| primipara                                  | 77(49.0%)  | 83(43.0%)   |                                         |
| multipara                                  | 80(51.0%)  | 110(57.0%)  |                                         |
| <b>ANC visit</b>                           |            |             | X <sup>2</sup> = 0.49 (p-value= 0.484)  |
| Yes                                        | 155(98.7%) | 192(99.5%)  |                                         |
| No                                         | 2(1.3%)    | 1(0.5%)     |                                         |
| <b>Frequency of ANC visit</b>              |            |             | X <sup>2</sup> = 7.68 (p-value= 0.0531) |
| once                                       | 3(1.9%)    | 8(4.1%)     |                                         |
| twice                                      | 38(24.5%)  | 47(24.4%)   |                                         |
| three                                      | 71(45.8%)  | 100(51.8%)  |                                         |
| ≥ 4                                        | 43(27.7%)  | 38(19.7%)   |                                         |
| <b>Had intrapartum fever</b>               |            |             | X <sup>2</sup> = 8.07 (p-value= 0.0045) |
| Yes                                        | 3(1.9%)    | 22(11.4%)   |                                         |
| No                                         | 154(98.1%) | 171(88.6%)  |                                         |
| <b>Onset of labor</b>                      |            |             | X <sup>2</sup> = 3.25 (p-value= 0.0714) |
| spontaneous                                | 134(85.4%) | 153(79.3%)  |                                         |
| induced                                    | 23(14.6%)  | 40(20.7%)   |                                         |
| <b>Labor time</b>                          |            |             | X <sup>2</sup> = 0.01 (p-value= 0.9321) |
| normal labor                               | 139(88.5%) | 171(88.6%)  |                                         |
| prolonged labor                            | 18(11.5%)  | 22(11.4%)   |                                         |
| <b>Place of delivery</b>                   |            |             | X <sup>2</sup> = 0.07 (p-value= 0.9653) |
| Home                                       | 9(5.7%)    | 8(4.1%)     |                                         |
| Health center                              | 14(8.9%)   | 24(12.4%)   |                                         |
| Hospital                                   | 134(85.4%) | 161(83.4%)  |                                         |
| <b>Mode of delivery</b>                    |            |             | X <sup>2</sup> = 3.83 (p-value= 0.1477) |
| SVD                                        | 113(72.0%) | 123(63.7%)  |                                         |
| Instrumental delivery                      | 3 (1.9%)   | 8 (4.1%)    |                                         |
| CS                                         | 41(26.1%)  | 62(32.1%)   |                                         |
| <b>Had PROM</b>                            |            |             | X <sup>2</sup> = 2.16 (p-value= 0.1418) |
| Yes                                        | 61(38.9%)  | 61(31.6%)   |                                         |
| No                                         | 96(61.1%)  | 132(68.4%)  |                                         |
| <b>Chorioamnionitis</b>                    |            |             | X <sup>2</sup> = 1.10 (p-value= 0.2943) |
| Yes                                        | 12(7.6%)   | 21(10.9%)   |                                         |
| No                                         | 145(92.4%) | 172(89.1%)  |                                         |
| <b>Had history of STI during pregnancy</b> |            |             | X <sup>2</sup> = 2.47 (p-value= 0.1161) |
| Yes                                        | 1(0.6%)    | 0(0.0%)     |                                         |
| No                                         | 156(99.4%) | 193(100.0%) |                                         |
| <b>Had Diagnosed gestational HTN</b>       |            |             | X <sup>2</sup> = 0.06 (p-value= 0.8080) |
| Yes                                        | 64(40.8%)  | 68(35.2%)   |                                         |
| No                                         | 93(59.2%)  | 125(64.8%)  |                                         |
| <b>Had gestational DM</b>                  |            |             | X <sup>2</sup> = 0.04 (p-value= 0.8360) |
| Yes                                        | 2(1.3%)    | 3 (1.6%)    |                                         |
| No                                         | 154(98.7%) | 190 (98.4%) |                                         |

|                                                                 |             |            |                                         |
|-----------------------------------------------------------------|-------------|------------|-----------------------------------------|
| <b>Had placenta abnormality</b>                                 |             |            | X <sup>2</sup> = 0.54 (p-value= 0.4609) |
| <b>Yes</b>                                                      | 6(3.8%)     | 8 (4.1%)   |                                         |
| <b>No</b>                                                       | 151(96.2%)  | 185(95.9%) |                                         |
| <b>Had APH</b>                                                  |             |            | X <sup>2</sup> = 0.38 (p-value= 0.5401) |
| <b>Yes</b>                                                      | 14(8.9%)    | 22(11.4%)  |                                         |
| <b>No</b>                                                       | 143(91.1%)  | 171(88.6%) |                                         |
| <b>VDRL test result</b>                                         |             |            | X <sup>2</sup> = 1.91 (p-value= 0.3849) |
| <b>non-reactive</b>                                             | 110(70.1%)  | 139(72.0%) |                                         |
| <b>reactive</b>                                                 | 0 (0.0%)    | 2(1.0%)    |                                         |
| <b>unknown status</b>                                           | 47(29.9%)   | 52(26.9%)  |                                         |
| <b>HIV test result</b>                                          |             |            | X <sup>2</sup> = 0.99 (p-value= 0.6105) |
| <b>non-reactive</b>                                             | 109(69.4%)  | 139(72.0%) |                                         |
| <b>reactive</b>                                                 | 1(0.6%)     | 1(0.5%)    |                                         |
| <b>unknown status</b>                                           | 47(29.9%)   | 53(27.5%)  |                                         |
| <b>Hepatitis B test result</b>                                  |             |            | X <sup>2</sup> = 4.22 (p-value= 0.1214) |
| <b>non-reactive</b>                                             | 101(64.74%) | 131(67.9%) |                                         |
| <b>reactive</b>                                                 | 1(0.64%)    | 7(3.6%)    |                                         |
| <b>unknown status</b>                                           | 54(34.6%)   | 55(28.5%)  |                                         |
| <b>Had RH incompatibility</b>                                   |             |            | X <sup>2</sup> = 4.22 (p-value= 5.05)   |
| <b>Yes</b>                                                      | 4(2.5%)     | 15(7.8%)   |                                         |
| <b>No</b>                                                       | 153(97.5%)  | 178(92.2%) |                                         |
| <b>Mother has taken dexamethasone for newborn lung maturity</b> |             |            | X <sup>2</sup> =3.93 (p-value= 0.0474)  |
| <b>Yes</b>                                                      | 4(2.5%)     | 14(7.3%)   |                                         |
| <b>No</b>                                                       | 153(97.5%)  | 179(92.7%) |                                         |
